# Supplementary material
Source: PubMed Central journal article supplement (PMC3102277)
Supplement: emboj201169s1.pdf [file emboj201169s1.pdf]

**SUPPLEMENTARY FIGURE LEGENDS****Figure S1**

- (A) Cell proliferation. Presenescent HCA2 cells (PRE) were treated with 10 Gy X-ray (XRA) and counted at the indicated intervals thereafter.
- (B) SA- $\beta$ gal staining. PRE cells were irradiated, allowed to senesce (SEN(XRA)) for 8-10 d, fixed, and stained for SA- $\beta$ gal.
- (C) XRA does not induce a rapid, transient increase in p38MAPK phosphorylation. PRE cells were either irradiated (XRA) or treated with 100 ng/mL LPS. Whole cell lysates were collected at the indicated intervals thereafter and analyzed by western blotting.
- (D) p38MAPK inhibition decreases secreted IL-6 in SEN(XRA) WI-38 cells. Presenescent WI-38 cells (PRE) were irradiated and allowed to senesce (SEN(XRA)). Conditioned media (CM) were collected and analyzed by ELISA. SB: p38MAPK was inhibited by SB023580 for 48 h prior to CM collection.
- (E) p38MAPK inhibition decreases secreted IL-6 by SEN(REP) HCA2 and WI-38 cells. PRE cells were cultured to replicative senescence (SEN(REP)), and CM were collected and analyzed by ELISA. SB: p38MAPK was inhibited by SB023580 for 48 h prior to CM collection.
- (F) Efficacy of p38MAPK $\alpha$  shRNAs. PRE cells were infected with a lentivirus expressing either of two shRNAs against p38 $\alpha$  (shp38 $\alpha$ ) or an shRNA against GFP (shGFP; control), and selected. Cells were irradiated and allowed to senesce (SEN(XRA)). Whole cell lysates were collected and analyzed by western blotting for the indicated p38MAPK isoforms and tubulin (control).
- (G) p38MAPK inhibition suppresses the SEN(XRA) SASP. Shown are factors for which the change between SEN(XRA)+SB and SEN(XRA) was statistically significant ( $p < 0.05$ ) (marked by asterisks in Figure 1E). Values indicate the  $\log_2$ -fold decrease from SEN(XRA) levels.
- (H) p38MAPK inhibition slightly increases secreted levels of some proteins. Factors for which p38MAPK inhibition by SB023580 (SB) increased secreted levels, relative to untreated SEN(XRA) cells. Values indicate the  $\log_2$ -fold change between SEN(XRA)+SB and SEN(XRA). None of the factors increased by SB were components of the SEN(XRA) SASP.
- (I) p38MAPK inhibition decreases MMP3 but not MMP1 secreted by SEN(XRA) cells. PRE cells were irradiated and allowed to senesce for 8 d (SEN(XRA)). CM were collected

and analyzed by ELISA. SB: p38MAPK was inhibited by SB023580 for 48 h prior to CM collection (2d), or p38MAPK was inhibited by SB203580 starting 48 h prior to irradiation and continuing until CM collection (cont).

## Figure S2

- (A) p38MAPK inhibition suppresses the SEN(RAS) SASP. PRE cells were infected as described in Figure 2A. +SB: p38MAPK was inhibited by SB203580 for 48 h prior to CM collection. Proteins secreted by the indicated cells were detected by antibody arrays. Shown are the 83 factors for which the SEN(RAS) level was significantly increased over PRE. For each protein, PRE and SEN(RAS) values were averaged to generate the baseline. Signals above baseline are yellow; signals below baseline are blue. The heat map key show  $\log_2$ -fold changes from baseline. The relationship between samples is indicated graphically by hierarchical clustering (top). Asterisks indicate the factors significantly decreased by p38MAPK inhibition.
- (B) p38MAPK inhibition decreases MMP1 and MMP3 secreted by SEN(RAS) cells. PRE cells were infected as described in Figure 2A. CM were collected and analyzed by ELISA. SB: p38MAPK was inhibited by SB023580 for 48 h prior to CM collection (2d), or p38MAPK was inhibited by SB203580 starting 48 h prior to irradiation and continuing until CM collection (cont).
- (C) The SEN(XRA) and SEN(RAS) SASPs are similarly dependent on p38MAPK. The table lists SASP factors that are significantly increased over PRE control in both SEN(XRA) and SEN(RAS) cells. • indicates factors significantly decreased by p38MAPK inhibition in both SEN(XRA) and SEN(RAS) cells.
- (D) Efficacy of p53 shRNAs. PRE cells were infected with a lentivirus expressing an shRNA against p53 (shp53) or GFP (shGFP; control) and selected. Whole cell lysates were collected and analyzed by western blotting for the indicated proteins.
- (E) Amplified levels of IL-6, IL-8 and GM-CSF induced by p53 depletion are p38MAPK dependent. PRE cells were infected with a lentivirus expressing an shRNA against p53 (shp53) or GFP (shGFP; control), selected, and allowed to recover. Cells were then irradiated and CM was collected 3 d later and analyzed by ELISA. SB: p38MAPK was inhibited by SB203580 for 48 h prior to CM collection.

## Figure S3

- (A) MKK6EE induces SA- $\beta$ gal expression. HCA2 and WI-38 cells were infected with a lentivirus expressing the constitutively active MAP kinase kinase 6 mutant (MKK6EE). Cells were selected, fixed 8 d after infection, and stained for SA- $\beta$ gal. Presenescent controls (PRE) were infected with an insertless vector.
- (B) MKK6EE suppresses BrdU incorporation. PRE cells were infected as described in (A), and 7 d later cultured with BrdU for 24 h, fixed, and immunostained for incorporated BrdU. BrdU-positive cells were quantified by CellProfiler. SB: p38MAPK was continuously inhibited with SB023580 beginning 48 h before infection.
- (C) MKK6EE induces a p38MAPK-dependent senescence morphology. PRE cells were infected as described in (A) and photographed through a phase contrast microscope 8 d after infection. Representative images are shown. +SB: p38MAPK was continuously inhibited with SB023580 beginning 48 h before infection.
- (D) MKK6EE increases secreted IL-6. PRE cells were infected as described in (A). CM were collected 8 d after infection and analyzed by ELISA. SB: p38MAPK was continuously inhibited with SB023580 beginning 48 h before infection.
- (E) MKK6EE increases secreted MMP1 and MMP3 levels. PRE cells were infected as described in (A). CM were collected 8 d after infection and analyzed by ELISA.

#### Figure S4

- (A) Effect of p38MAPK inhibition on 53BP1 foci formation and resolution. PRE cells were irradiated, fixed at the indicated intervals thereafter, and analyzed by immunostaining for 53BP1. Foci were quantitated using CellProfiler. Cells with  $\geq 3$  53BP1 foci/nucleus were scored. Error bars indicate the margin of error at 95% confidence. +SB: p38MAPK was continuously inhibited by SB203580 beginning 48 h before irradiation.
- (B) Effect of p38MAPK inhibition on 53BP1 foci in replicatively senescent cells. PRE cells were cultured to replicative senescence (SEN(REP)), then fixed and analyzed by immunostaining for 53BP1. Foci were quantitated using CellProfiler. +SB: p38MAPK was inhibited by SB023580 for 6 d prior to fixation.
- (C) Constitutive p38MAPK activation does not induce 53BP1 foci. Cells were fixed 8 d after MKK6EE expression (MKK6EE), 10 d after RAS expression (SEN(RAS)), 8 d after irradiation (SEN(XRA)), and after replicative senescence (69 population doublings) (SEN(REP)) and immunostained for 53BP1. Foci were quantified using CellProfiler. The data are identical to Figure 4B, displayed as a histogram.

- (D) Oncogenic RAS, but not constitutive p38MAPK activation, induces p53 phosphorylation. Cells were infected with a RAS lentivirus or an MKK6EE lentivirus. Whole cell lysates were collected at the indicated timepoints and analyzed by western blotting. p53-P (Ser15), p53 phosphorylated on residue Ser15.
- (E) ATM or Chk2 depletion by RNAi. PRE cells were simultaneously infected with a lentivirus expressing MKK6EE and a lentivirus expressing an shRNA against ATM (shATM #12), CHK2 (shChk2 #2, shChk2 #12), or GFP (shGFP; control) and selected. Whole cell lysates were collected 8 d after infection and analyzed by western blotting for the indicated proteins. Presenescent controls (PRE) were infected with an insertless vector.
- (F) SB203580 dose response – effect on p38MAPK signaling. PRE cells were irradiated (XRA) or infected with a lentivirus expressing MKK6EE (MKK6EE), and whole cell lysate was collected 8 d later and analyzed by western blotting. p38MAPK was continuously inhibited by SB203580 (SB) at the indicated concentrations beginning 48 h before irradiation/infection.
- (G) SB203580 dose response – effect on IL-6 secretion. Cells were treated as in (E) and CM were collected 8 d later and analyzed by ELISA.

### Figure S5

- (A) p38MAPK inhibition decreases SASP mRNA levels in WI-38 cells. PRE WI-38 cells were irradiated and allowed to senesce (SEN(XRA)). Total RNA was extracted and mRNA levels for the indicated genes were analyzed by quantitative RT-PCR. For each gene, the four conditions were averaged to generate the baseline. Signals above baseline are red; signals below baseline are green. The heat map key shows  $\log_2$ -fold changes from baseline. +SB: p38MAPK was inhibited with SB203580 for 48 h prior to sample collection. p38MAPK inhibition significantly decreased ( $p < 0.05$ ) mRNA levels for all genes shown except GM-CSF.
- (B) Decreased mRNA levels closely match decreased secreted protein levels. PRE cells were irradiated and allowed to senesce (SEN(XRA)), then CM and RNA were collected. mRNA levels for IL-6, IL-8 and GM-CSF were analyzed by quantitative RT-PCR; secreted protein levels were analyzed by ELISA. SEN(XRA) mRNA and protein levels were set to 1 for each factor. SB: p38MAPK was inhibited with SB203580 for 48 h prior to sample collection. For all factors, the fold decrease in mRNA level after p38MAPK inhibition was not significantly different from the fold decrease in protein level ( $p > 0.05$ ).

- (C) MKK6EE increases mRNA levels of IL-6 and IL-8. PRE cells were infected with a lentivirus expressing MKK6EE and selected. Total RNA was extracted 8 d after infection and mRNA levels for the indicated genes were analyzed by quantitative RT-PCR. Presenescent controls (PRE) were infected with an insertless vector.
- (D) NF- $\kappa$ B DNA binding activity increases in multiple types of senescence. PRE cells were induced to senesce (SEN) by the indicated stimuli, and whole cell lysates were collected and assayed for NF- $\kappa$ B DNA binding activity.
- (E) NF- $\kappa$ B DNA binding increases in senescent WI-38 cells. PRE WI-38 cells were irradiated and allowed to senesce (SEN(XRA)). Whole cell lysates were collected and assayed for NF- $\kappa$ B DNA binding activity.
- (F) NF- $\kappa$ B DNA binding activity kinetics after DNA damage. PRE cells were irradiated (XRA); whole cell lysates were collected at the indicated intervals thereafter and assayed for NF- $\kappa$ B DNA binding activity.
- (G) Efficacy of RelA shRNAs. PRE cells were infected with a lentivirus expressing either of two shRNAs against RelA (shRelA #1, #2) or GFP (shGFP; control) and selected. Whole cell lysates were collected and analyzed by western blotting for the indicated NF- $\kappa$ B family members and tubulin (control).
- (H) RelA depletion decreases secreted MMP1 and MMP3 levels. PRE cells were infected with lentiviruses expressing either of two shRNAs against RelA (shRNA #1, #2) or GFP (shGFP; control) and selected. Cells were then irradiated and allowed to senesce (SEN(XRA)). CM were collected and analyzed by ELISA.
- (I) RelA depletion decreases secreted IL-6 levels in senescent HCA2 and WI-38 cells. PRE HCA2 (top) or WI-38 (bottom) cells were treated as described in (H). CM were collected and analyzed by ELISA.
- (J) RelA depletion reduces the MKK6EE-induced SASP. PRE cells were infected with a lentivirus expressing either of two shRNAs against RelA (shRelA) or GFP (shGFP; control) and selected. Cells were then infected with a lentivirus lacking an insert (PRE) or expressing MKK6EE (MKK6EE). CM were collected 8d after infection and analyzed by ELISA.

# Freund Figure S1

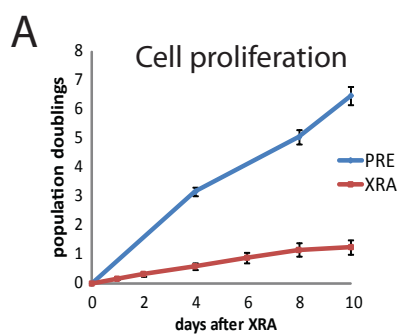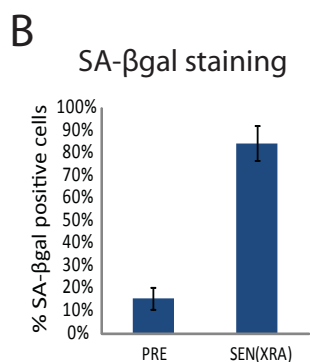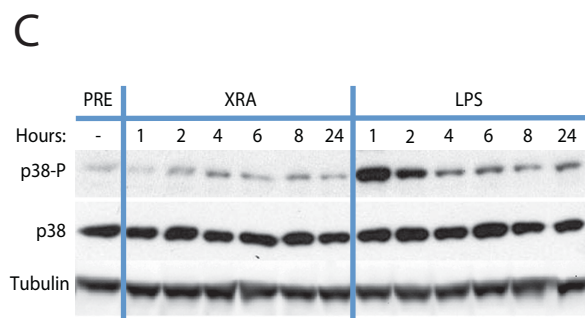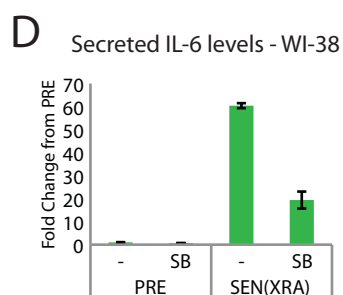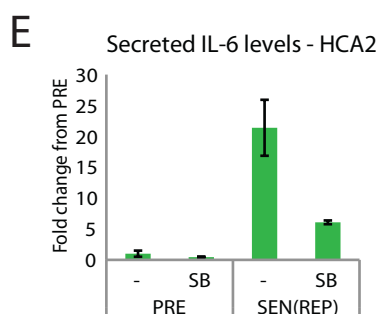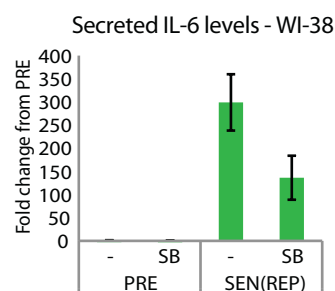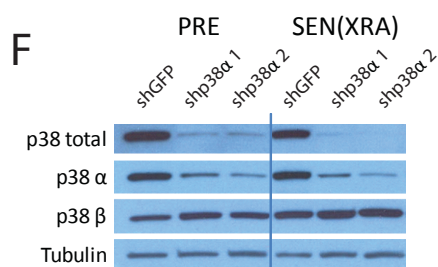

**H** Proteins increased by p38 Inhibition

| Factor         | Log <sub>2</sub> change from SEN(XRA) | p-value |
|----------------|---------------------------------------|---------|
| VEGF-D         | 0.01                                  | 0.99    |
| MIP-1beta      | 0.03                                  | 0.91    |
| GITR           | 0.05                                  | 0.87    |
| FGF-9          | 0.09                                  | 0.67    |
| b-NGF          | 0.09                                  | 0.82    |
| HGF            | 0.10                                  | 0.78    |
| sTNF RII       | 0.15                                  | 0.69    |
| Oncostatin M   | 0.15                                  | 0.48    |
| Axl            | 0.18                                  | 0.51    |
| IL-2 Rapha     | 0.21                                  | 0.37    |
| bFGF           | 0.21                                  | 0.26    |
| Angiopoietin-2 | 0.22                                  | 0.32    |
| AgRP           | 0.31                                  | 0.40    |
| BTC            | 0.34                                  | 0.55    |
| VEGF           | 0.39                                  | 0.57    |
| Amphiregulin   | 0.41                                  | 0.12    |
| HCC-4          | 1.04                                  | 0.16    |

**G** SASP proteins significantly reduced by p38 Inhibition

| Factor          | Log <sub>2</sub> change from SEN(XRA) |
|-----------------|---------------------------------------|
| GRO             | -3.31                                 |
| IL-6            | -2.84                                 |
| IL-8            | -2.47                                 |
| MCP-2           | -2.43                                 |
| MCP-3           | -1.99                                 |
| GCP-2           | -1.35                                 |
| GRO-alpha       | -1.26                                 |
| Angiogenin      | -1.22                                 |
| GM-CSF          | -1.04                                 |
| MCP-1           | -0.99                                 |
| CNTF            | -0.91                                 |
| GDNF            | -0.90                                 |
| IL-10           | -0.87                                 |
| IL-7            | -0.80                                 |
| MIG             | -0.74                                 |
| IL-2            | -0.73                                 |
| TGF-beta 1      | -0.72                                 |
| IL-1alpha       | -0.71                                 |
| Eotaxin         | -0.68                                 |
| IGFBP-4         | -0.67                                 |
| TNF-beta        | -0.64                                 |
| Osteoprotegerin | -0.59                                 |
| TNF-alpha       | -0.58                                 |
| IL-5            | -0.53                                 |
| sgp130          | -0.46                                 |

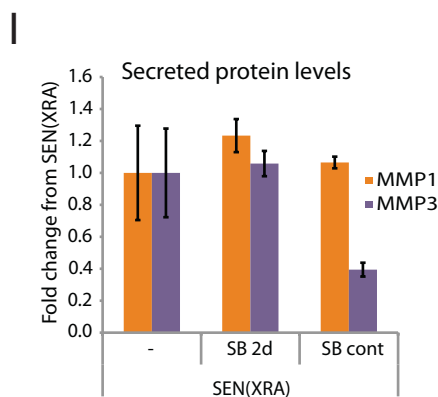

A

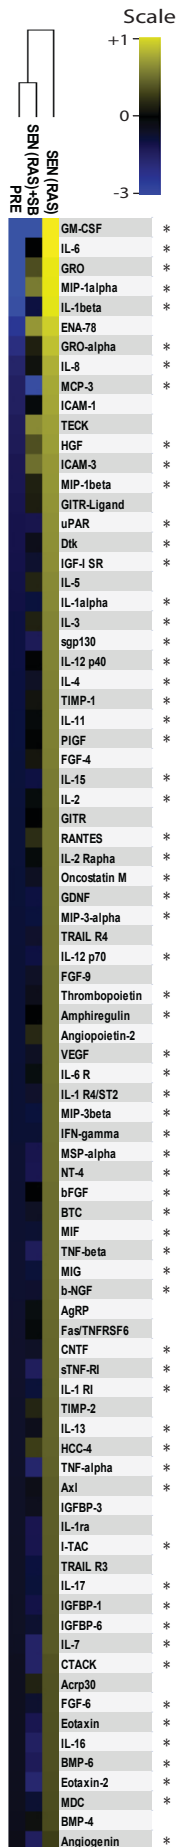

B

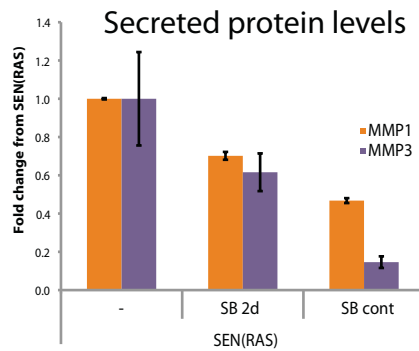

C

| Factor     | p38MAPK-dependent in XRA and RAS |
|------------|----------------------------------|
| GM-CSF     | •                                |
| IL-6       | •                                |
| GRO        | •                                |
| GRO-alpha  | •                                |
| MCP-3      | •                                |
| IL-8       | •                                |
| IL-5       |                                  |
| IL-1alpha  | •                                |
| IL-3       |                                  |
| sgp130     | •                                |
| IL-2       | •                                |
| GDNF       | •                                |
| TNF-beta   | •                                |
| MIG        | •                                |
| CNTF       | •                                |
| TNF-alpha  | •                                |
| IGFBP-1    |                                  |
| IGFBP-6    | •                                |
| IL-7       | •                                |
| Eotaxin    | •                                |
| BMP-6      |                                  |
| BMP-4      |                                  |
| Angiogenin | •                                |

E

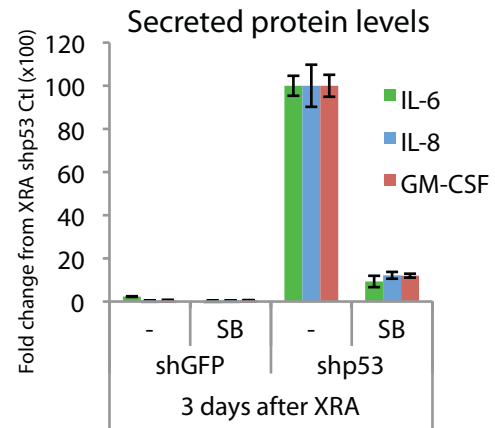

D

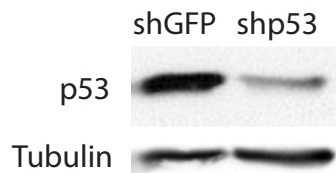

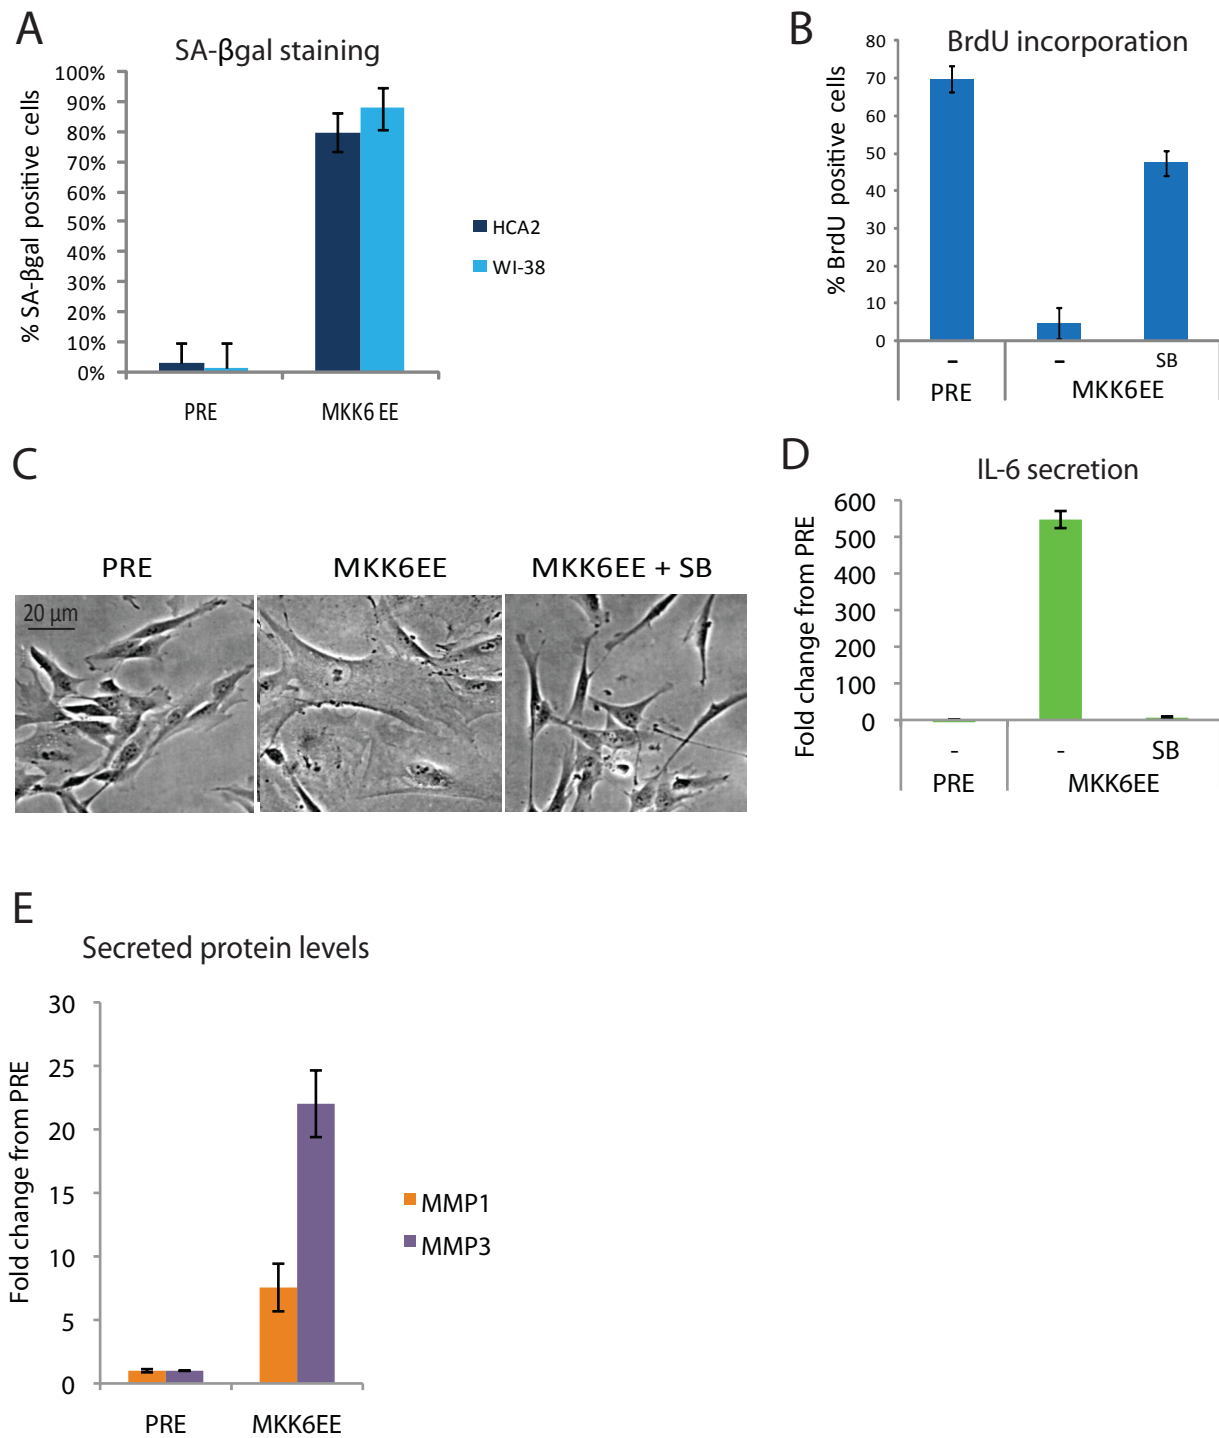



**A** 53BP1 foci - formation and resolution

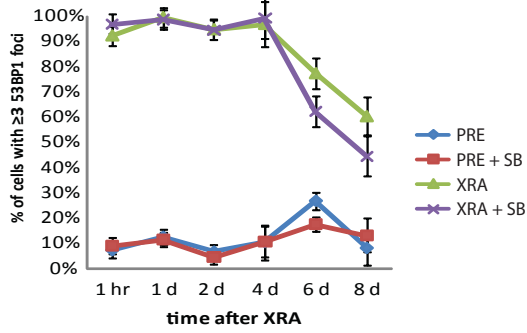

**B** 53BP1 foci

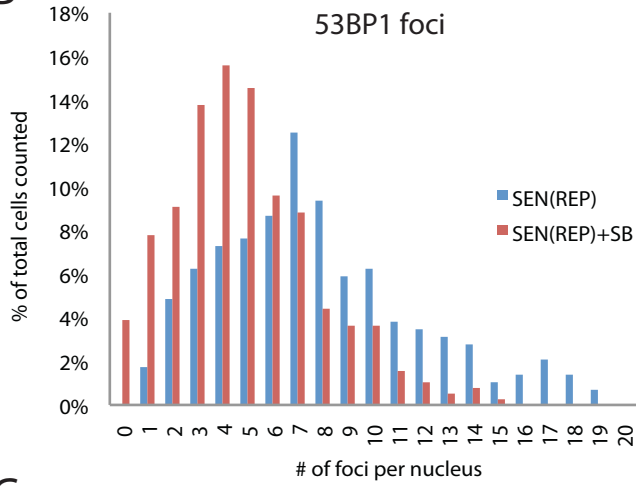

**C** 53BP1 foci

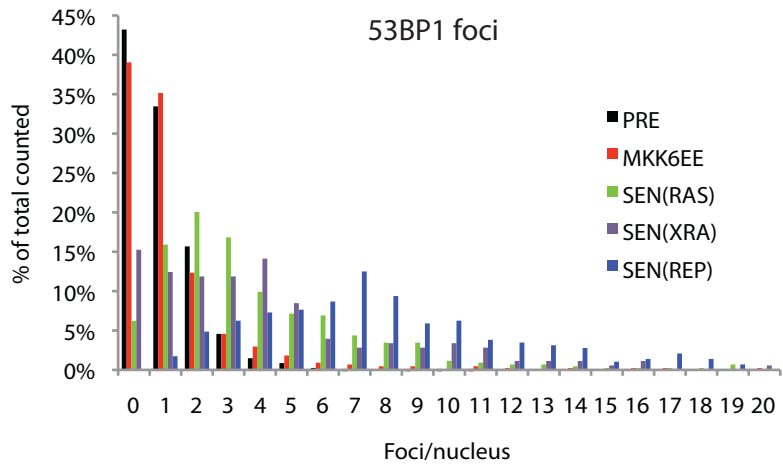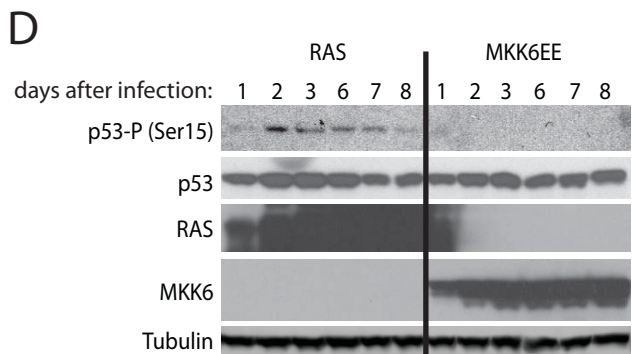

**E** Freund Figure S4

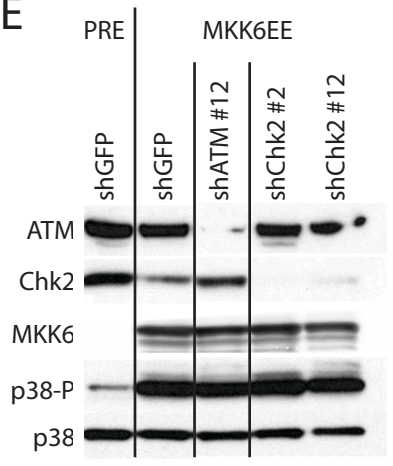

**F**

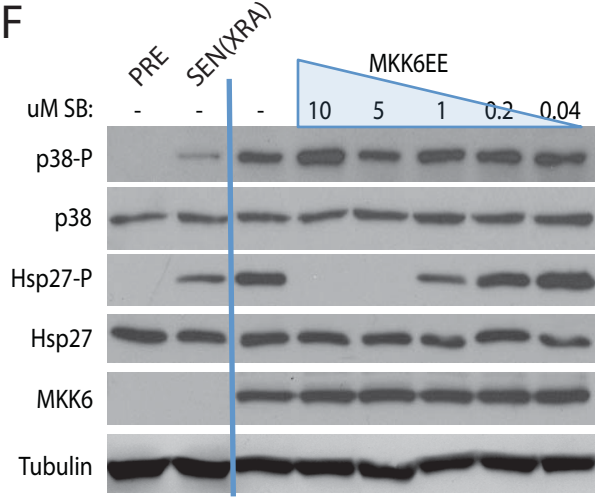

**G** IL-6 secretion

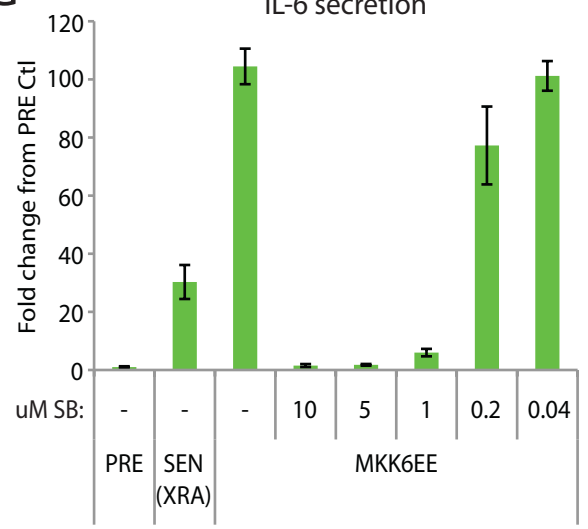

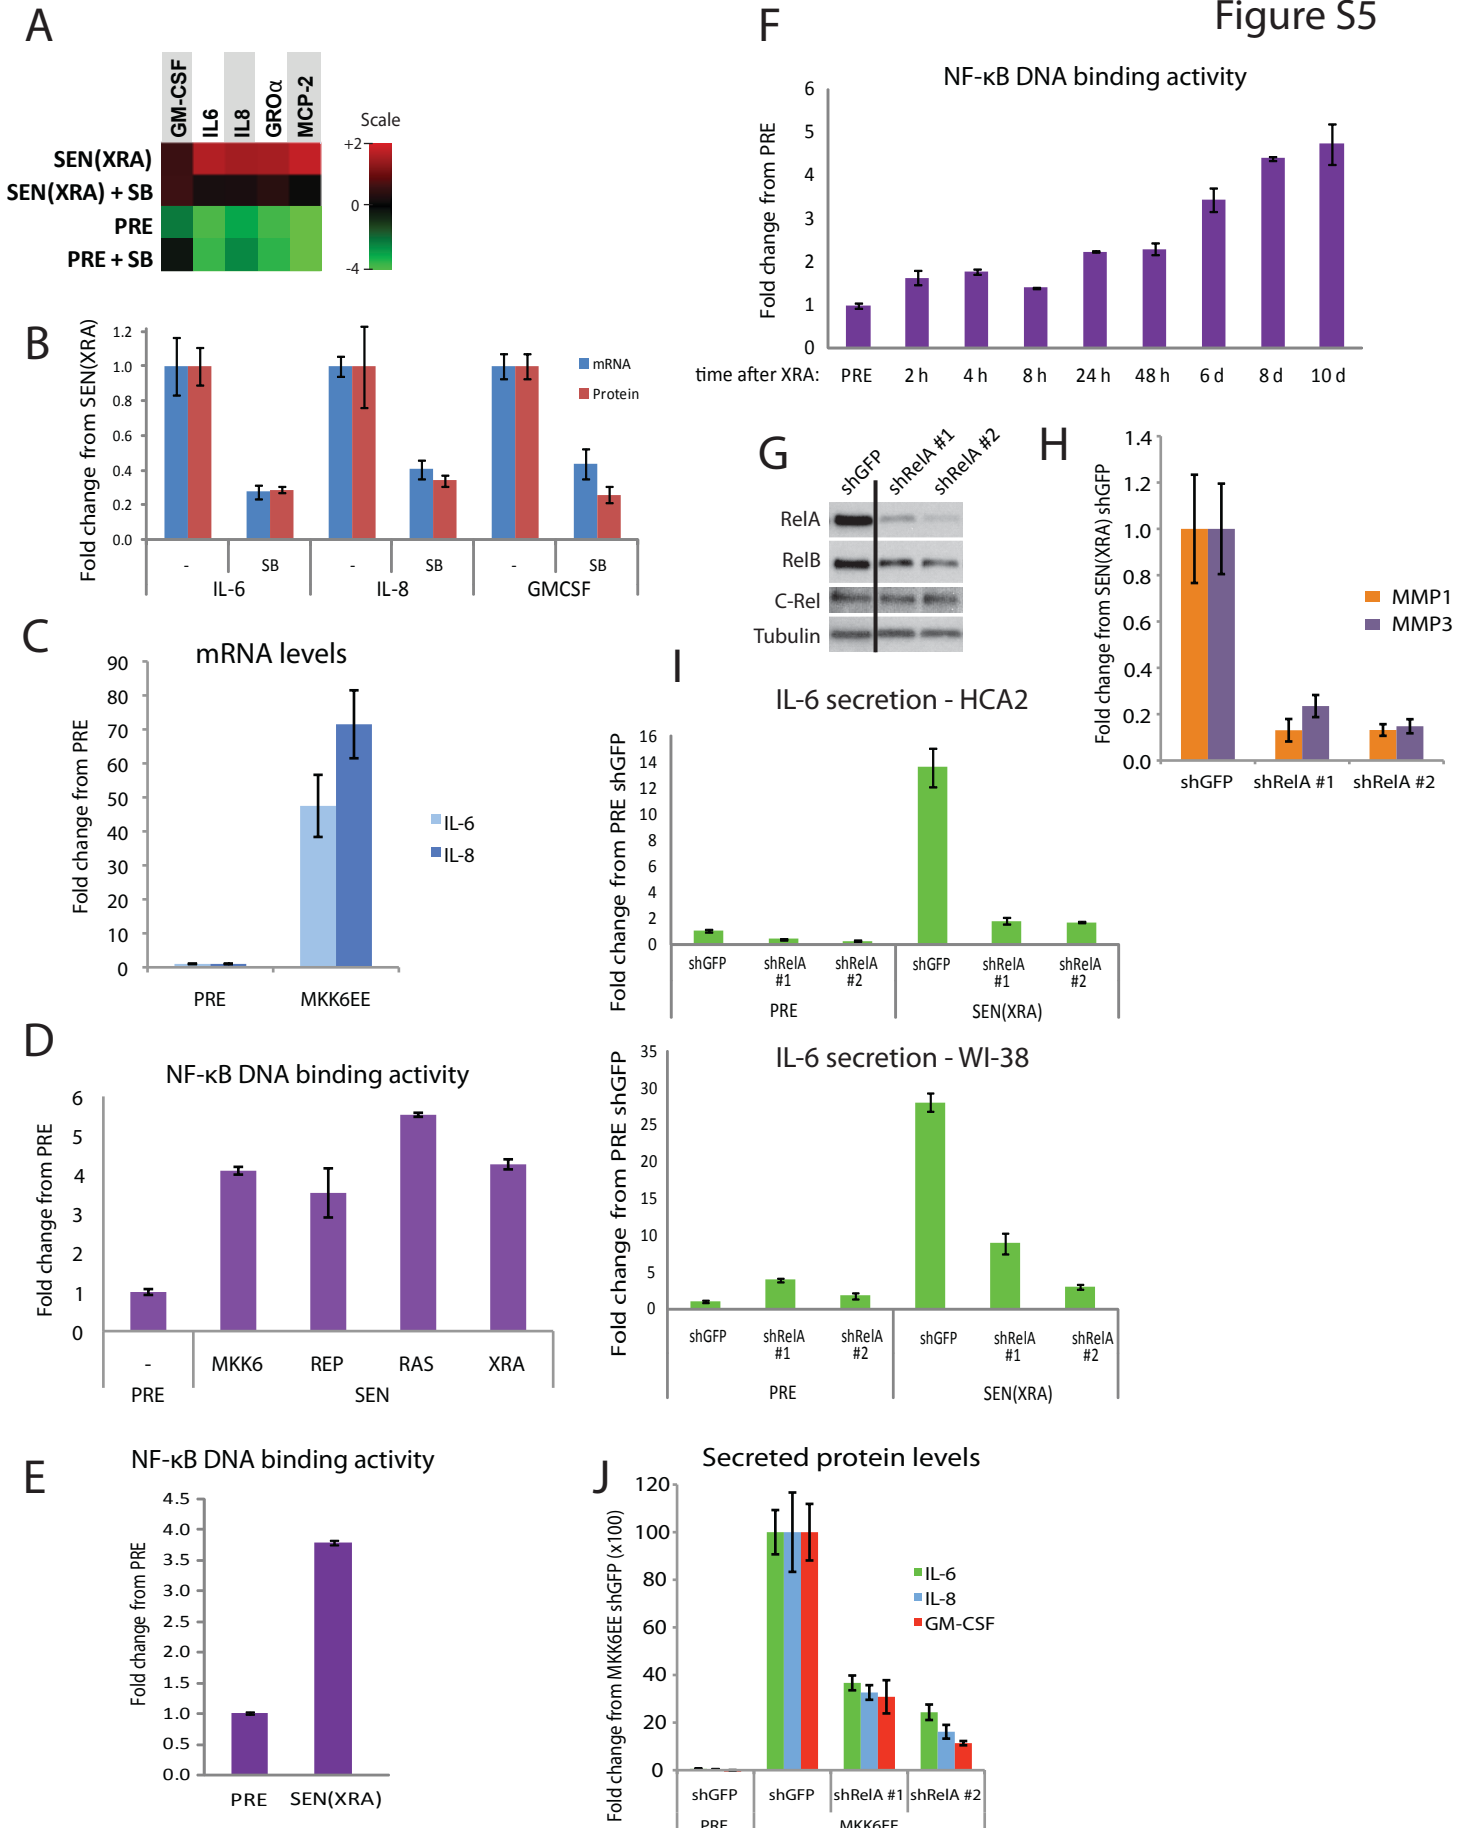

**Table S1: Statistical Analyses for Figures**

**Figure 1C**

| IL-6        |         |              | p-values |          |
|-------------|---------|--------------|----------|----------|
| Sample      | Average | Standard Dev | PRE      | SEN(XRA) |
| PRE         | 1.00    | 0.16         |          |          |
| SEN(XRA)    | 6.16    | 1.31         | 2.47E-03 |          |
| SEN(XRA)+SB | 2.06    | 0.11         | 6.31E-04 | 5.69E-03 |

| IL-8        |         |              | p-values |          |
|-------------|---------|--------------|----------|----------|
| Sample      | Average | Standard Dev | PRE      | SEN(XRA) |
| PRE         | 1.00    | 0.28         |          |          |
| SEN(XRA)    | 6.39    | 1.50         | 3.65E-03 |          |
| SEN(XRA)+SB | 2.34    | 0.32         | 5.63E-03 | 1.03E-02 |

| GM-CSF      |         |              | p-values |          |
|-------------|---------|--------------|----------|----------|
| Sample      | Average | Standard Dev | PRE      | SEN(XRA) |
| PRE         | 1.00    | 0.43         |          |          |
| SEN(XRA)    | 6.86    | 0.51         | 1.09E-04 |          |
| SEN(XRA)+SB | 1.66    | 0.19         | 7.18E-02 | 7.85E-05 |

**Figure 1D**

| IL-6     |          |         |              | p-values |          |          |          |          |
|----------|----------|---------|--------------|----------|----------|----------|----------|----------|
| Sample   |          | Average | Standard Dev | PRE      |          |          | SEN(XRA) |          |
|          |          |         |              | shGFP    | shp38 #1 | shp38 #2 | shGFP    | shp38 #1 |
| PRE      | shGFP    | 1.00    | 0.10         |          |          |          |          |          |
|          | shp38 #1 | 0.93    | 0.11         | 4.67E-01 |          |          |          |          |
|          | shp38 #2 | 0.35    | 0.00         | 3.97E-04 | 6.85E-04 |          |          |          |
| SEN(XRA) | shGFP    | 7.08    | 0.62         | 7.36E-05 | 7.07E-05 | 4.67E-05 |          |          |
|          | shp38 #1 | 2.88    | 0.56         | 4.51E-03 | 3.97E-03 | 1.40E-03 | 9.46E-04 |          |
|          | shp38 #2 | 1.24    | 0.08         | 7.25E-02 | 4.18E-02 | 2.40E-04 | 1.07E-03 | 2.91E-02 |

**Figure 1F**

| Invasion |          |         |              | p-values |          |          |          |          |
|----------|----------|---------|--------------|----------|----------|----------|----------|----------|
| Sample   |          | Average | Standard Dev | PRE      |          |          | SEN(XRA) |          |
|          |          |         |              | shGFP    | shp38 #1 | shp38 #2 | shGFP    | shp38 #1 |
| PRE      | shGFP    | 50.00   | 8.52         |          |          |          |          |          |
|          | shp38 #1 | 51.25   | 23.31        | 9.23E-01 |          |          |          |          |
|          | shp38 #2 | 48.50   | 5.80         | 7.81E-01 | 8.27E-01 |          |          |          |
| SEN(XRA) | shGFP    | 306.75  | 35.87        | 8.54E-06 | 2.09E-05 | 7.58E-06 |          |          |
|          | shp38 #1 | 136.50  | 27.20        | 9.08E-04 | 3.13E-03 | 7.28E-04 | 2.77E-04 |          |
|          | shp38 #2 | 104.25  | 21.70        | 3.49E-03 | 1.58E-02 | 2.54E-03 | 7.05E-05 | 1.13E-01 |

**Figure 2D**

| IL-6         |         |              | p-values |          |          |
|--------------|---------|--------------|----------|----------|----------|
| Sample       | Average | Standard Dev | PRE      | SEN(XRA) | SEN(RAS) |
| PRE          | 1.00    | 0.10         |          |          |          |
| SEN(XRA)     | 15.60   | 1.52         | 1.09E-04 |          |          |
| SEN(RAS)     | 85.73   | 17.41        | 1.08E-03 | 2.03E-03 |          |
| SEN(XRA)+GSE | 438.31  | 20.06        | 2.95E-06 | 3.45E-06 | 3.87E-05 |

**Figure 2F**

| IL-6   |    |         |              | p-values |          |          |
|--------|----|---------|--------------|----------|----------|----------|
| Sample |    | Average | Standard Dev | L3P -    | L3P+SB   | GSE -    |
| L3P    | -  | 0.65    | 0.05         |          |          |          |
|        | SB | 0.38    | 0.04         | 1.81E-03 |          |          |
| GSE    | -  | 100.00  | 4.58         | 2.99E-06 | 2.96E-06 |          |
|        | SB | 9.56    | 0.76         | 3.51E-05 | 3.11E-05 | 4.59E-06 |

| IL-8   |    |         |              | p-values |          |          |
|--------|----|---------|--------------|----------|----------|----------|
| Sample |    | Average | Standard Dev | L3P -    | L3P+SB   | GSE -    |
| L3P    | -  | 0.39    | 0.06         |          |          |          |
|        | SB | 0.42    | 0.09         | 6.39E-01 |          |          |
| GSE    | -  | 100.00  | 2.32         | 1.89E-07 | 1.89E-07 |          |
|        | SB | 0.57    | 0.89         | 1.40E-01 | 1.31E-01 | 2.59E-07 |

| GM-CSF |    |         |              | p-values |          |          |
|--------|----|---------|--------------|----------|----------|----------|
| Sample |    | Average | Standard Dev | L3P -    | L3P+SB   | GSE -    |
| L3P    | -  | 0.45    | 0.03         |          |          |          |
|        | SB | 0.50    | 0.03         | 1.48E-01 |          |          |
| GSE    | -  | 100.00  | 9.59         | 5.43E-05 | 5.42E-05 |          |
|        | SB | 7.13    | 0.58         | 2.31E-05 | 2.25E-05 | 7.46E-05 |

**Figure 4B**

| 53BP1 foci |  | p-values |
|------------|--|----------|
|            |  |          |

| Sample       | % ≥3 53BP1 foci | Standard Error | PRE (Vector) | MKK6EE   | SEN(RAS) | SEN(XRA) |
|--------------|-----------------|----------------|--------------|----------|----------|----------|
| PRE (Vector) | 14.1%           | 3.5%           |              |          |          |          |
| MKK6EE       | 18.3%           | 4.8%           | 5.12E-02     |          |          |          |
| SEN(RAS)     | 57.8%           | 4.8%           | 1.03E-58     | 2.22E-33 |          |          |
| SEN(XRA)     | 60.5%           | 7.5%           | 5.37E-41     | 7.29E-25 | 5.51E-01 |          |
| SEN(REP)     | 93.4%           | 5.9%           | 5.00E-130    | 1.87E-87 | 1.90E-25 | 1.79E-18 |

**Figure 4D**

| IL-6   |            |         |              | p-values  |          |                  |           |
|--------|------------|---------|--------------|-----------|----------|------------------|-----------|
| Sample |            | Average | Standard Dev | PRE shGFP | shGFP    | MKK6EE shATM #12 | shChk2 #2 |
| PRE    | shGFP      | 0.44    | 0.04         |           |          |                  |           |
| MKK6EE | shGFP      | 100.00  | 12.74        | 1.73E-04  |          |                  |           |
|        | shATM #12  | 116.13  | 4.37         | 1.35E-06  | 1.07E-01 |                  |           |
|        | shChk2 #2  | 91.12   | 18.09        | 9.70E-04  | 5.25E-01 | 8.04E-02         |           |
|        | shChk2 #12 | 94.55   | 6.92         | 1.33E-05  | 7.72E-01 | 1.44E-02         | 5.99E-01  |

| IL-8   |            |         |              | p-values  |          |                  |           |
|--------|------------|---------|--------------|-----------|----------|------------------|-----------|
| Sample |            | Average | Standard Dev | PRE shGFP | shGFP    | MKK6EE shATM #12 | shChk2 #2 |
| PRE    | shGFP      | 0.06    | 0.07         |           |          |                  |           |
| MKK6EE | shGFP      | 100.00  | 9.93         | 4.90E-03  |          |                  |           |
|        | shATM #12  | 121.59  | 13.82        | 2.85E-03  | 1.43E-01 |                  |           |
|        | shChk2 #2  | 82.61   | 12.67        | 1.16E-02  | 2.66E-01 | 6.93E-02         |           |
|        | shChk2 #12 | 94.61   | 13.20        | 4.48E-03  | 6.57E-01 | 9.55E-02         | 3.74E-01  |

| GM-CSF |            |         |              | p-values  |          |                  |           |
|--------|------------|---------|--------------|-----------|----------|------------------|-----------|
| Sample |            | Average | Standard Dev | PRE shGFP | shGFP    | MKK6EE shATM #12 | shChk2 #2 |
| PRE    | shGFP      | 0.02    | 0.01         |           |          |                  |           |
| MKK6EE | shGFP      | 100.00  | 17.13        | 4.33E-03  |          |                  |           |
|        | shATM #12  | 120.69  | 1.40         | 8.89E-04  | 3.00E-01 |                  |           |
|        | shChk2 #2  | 120.34  | 31.50        | 3.26E-02  | 4.03E-01 | 8.73E-01         |           |
|        | shChk2 #12 | 154.57  | 1.78         | 6.61E-05  | 2.37E-02 | 9.15E-03         | 2.65E-01  |

**Figure 5A**

| GM-CSF        |         |              | p-values |          |          |
|---------------|---------|--------------|----------|----------|----------|
| Sample        | Average | Standard Dev | PRE      | PRE + SB | SEN(XRA) |
| PRE           | 1.00    | 0.08         |          |          |          |
| PRE + SB      | 0.77    | 0.06         | 2.40E-02 |          |          |
| SEN(XRA)      | 24.55   | 1.81         | 1.34E-06 | 4.01E-04 |          |
| SEN(XRA) + SB | 10.67   | 2.16         | 5.03E-04 | 2.31E-02 | 4.31E-03 |

| IL-6          |         |              | p-values |          |          |
|---------------|---------|--------------|----------|----------|----------|
| Sample        | Average | Standard Dev | PRE      | PRE + SB | SEN(XRA) |
| PRE           | 1.00    | 0.06         |          |          |          |
| PRE + SB      | 0.73    | 0.05         | 6.66E-03 |          |          |
| SEN(XRA)      | 17.00   | 2.81         | 7.71E-05 | 4.43E-03 |          |
| SEN(XRA) + SB | 4.63    | 0.70         | 2.95E-04 | 1.59E-02 | 1.01E-02 |

| IL-8          |         |              | p-values |          |          |
|---------------|---------|--------------|----------|----------|----------|
| Sample        | Average | Standard Dev | PRE      | PRE + SB | SEN(XRA) |
| PRE           | 1.00    | 0.04         |          |          |          |
| PRE + SB      | 0.90    | 0.04         | 2.94E-02 |          |          |
| SEN(XRA)      | 17.80   | 1.03         | 4.34E-07 | 2.06E-04 |          |
| SEN(XRA) + SB | 7.20    | 0.98         | 1.29E-04 | 1.19E-02 | 1.44E-03 |

| GRO $\alpha$  |         |              | p-values |          |          |
|---------------|---------|--------------|----------|----------|----------|
| Sample        | Average | Standard Dev | PRE      | PRE + SB | SEN(XRA) |
| PRE           | 1.00    | 0.15         |          |          |          |
| PRE + SB      | 1.03    | 0.11         | 8.19E-01 |          |          |
| SEN(XRA)      | 8.28    | 0.36         | 2.44E-07 | 1.15E-04 |          |
| SEN(XRA) + SB | 3.64    | 0.02         | 1.79E-05 | 8.74E-04 | 4.09E-04 |

| MCP-2         |         |              | p-values |          |          |
|---------------|---------|--------------|----------|----------|----------|
| Sample        | Average | Standard Dev | PRE      | PRE + SB | SEN(XRA) |
| PRE           | 1.00    | 0.36         |          |          |          |
| PRE + SB      | 0.15    | 0.04         | 3.58E-02 |          |          |
| SEN(XRA)      | 91.46   | 16.39        | 9.01E-05 | 4.96E-03 |          |
| SEN(XRA) + SB | 15.63   | 2.89         | 3.35E-04 | 1.70E-02 | 8.61E-03 |

| IL-1 $\alpha$ |         |              | p-values |          |          |
|---------------|---------|--------------|----------|----------|----------|
| Sample        | Average | Standard Dev | PRE      | PRE + SB | SEN(XRA) |
| PRE           | 1.00    | 0.26         |          |          |          |
| PRE + SB      | 0.15    | 0.05         | 1.92E-02 |          |          |
| SEN(XRA)      | 27.71   | 5.08         | 8.18E-04 | 5.35E-03 |          |
| SEN(XRA) + SB | 8.27    | 0.95         | 9.01E-04 | 6.79E-03 | 1.47E-02 |

**Figure 5D**

| IL-6     |         |              | p-values |
|----------|---------|--------------|----------|
| Sample   | Average | Standard Dev | PRE      |
| PRE      | 3.11    | 1.35         |          |
| SEN(XRA) | 100.00  | 52.26        | 3.40E-03 |

| IL-8     |         |              | p-values |
|----------|---------|--------------|----------|
| Sample   | Average | Standard Dev | PRE      |
| PRE      | 0.62    | 0.72         |          |
| SEN(XRA) | 100.00  | 31.89        | 2.41E-04 |

| GM-CSF   |         |              | p-values |
|----------|---------|--------------|----------|
| Sample   | Average | Standard Dev | PRE      |
| PRE      | 5.19    | 4.13         |          |
| SEN(XRA) | 100.00  | 31.60        | 8.44E-03 |

**Figure 5E**

| NF-κB transcriptional activity |            |       |              | p-values |          |             |                |
|--------------------------------|------------|-------|--------------|----------|----------|-------------|----------------|
| Sample                         |            | Value | Standard Dev | PRE      | SEN(XRA) | SEN(XRA)+SB | SEN(XRA)+shATM |
| PRE                            | -          | 1.00  | 0.02         |          |          |             |                |
| SEN(XRA)                       | -          | 35.92 | 2.03         | 4.9E-07  |          |             |                |
|                                | SB         | 10.23 | 1.45         | 1.4E-07  | 5.1E-06  |             |                |
|                                | shATM      | 8.66  | 0.73         | 2.8E-07  | 3.3E-06  | 2.4E-01     |                |
|                                | SB + shATM | 1.98  | 0.87         | 5.1E-07  | 6.6E-07  | 3.1E-07     | 7.5E-07        |

**Figure 5H**

| IL-6         |           |         |              | p-values     |           |           |          |           |
|--------------|-----------|---------|--------------|--------------|-----------|-----------|----------|-----------|
| Sample       |           | Average | Standard Dev | PRE (Vector) |           |           | SEN(RAS) |           |
|              |           |         |              | shGFP        | shRelA #1 | shRelA #2 | shGFP    | shRelA #1 |
| PRE (Vector) | shGFP     | 4.29    | 1.16         |              |           |           |          |           |
|              | shRelA #1 | 0.57    | 0.04         | 5.04E-03     |           |           |          |           |
|              | shRelA #2 | 0.18    | 0.02         | 3.51E-03     | 6.97E-05  |           |          |           |
| SEN(RAS)     | shGFP     | 100.00  | 9.06         | 5.43E-05     | 4.52E-05  | 4.45E-05  |          |           |
|              | shRelA #1 | 34.90   | 3.39         | 5.93E-04     | 3.09E-04  | 2.99E-04  | 2.62E-03 |           |
|              | shRelA #2 | 12.17   | 3.75         | 2.55E-02     | 5.87E-03  | 5.22E-03  | 1.01E-04 | 6.38E-03  |

| IL-8         |           |         |              | p-values     |           |           |          |           |
|--------------|-----------|---------|--------------|--------------|-----------|-----------|----------|-----------|
| Sample       |           | Average | Standard Dev | PRE (Vector) |           |           | SEN(RAS) |           |
|              |           |         |              | shGFP        | shRelA #1 | shRelA #2 | shGFP    | shRelA #1 |
| PRE (Vector) | shGFP     | 1.20    | 0.55         |              |           |           |          |           |
|              | shRelA #1 | 2.16    | 0.49         | 1.34E-01     |           |           |          |           |
|              | shRelA #2 | 1.13    | 0.66         | 9.08E-01     | 9.77E-02  |           |          |           |
| SEN(RAS)     | shGFP     | 100.00  | 6.24         | 2.30E-04     | 1.11E-05  | 1.07E-05  |          |           |
|              | shRelA #1 | 32.67   | 5.73         | 5.19E-03     | 7.76E-04  | 6.91E-04  | 1.61E-04 |           |
|              | shRelA #2 | 14.11   | 1.69         | 2.15E-03     | 3.02E-04  | 2.46E-04  | 2.12E-05 | 5.75E-03  |

| GM-CSF       |           |         |              | p-values     |           |           |          |           |
|--------------|-----------|---------|--------------|--------------|-----------|-----------|----------|-----------|
| Sample       |           | Average | Standard Dev | PRE (Vector) |           |           | SEN(RAS) |           |
|              |           |         |              | shGFP        | shRelA #1 | shRelA #2 | shGFP    | shRelA #1 |
| PRE (Vector) | shGFP     | 0.89    | 0.45         |              |           |           |          |           |
|              | shRelA #1 | 1.27    | 0.42         | 3.49E-01     |           |           |          |           |
|              | shRelA #2 | 0.79    | 0.46         | 7.97E-01     | 2.54E-01  |           |          |           |
| SEN(RAS)     | shGFP     | 100.00  | 5.25         | 5.28E-06     | 5.35E-06  | 5.26E-06  |          |           |
|              | shRelA #1 | 41.23   | 3.08         | 2.33E-05     | 2.40E-05  | 2.31E-05  | 7.48E-05 |           |
|              | shRelA #2 | 26.51   | 3.41         | 2.09E-04     | 2.20E-04  | 2.06E-04  | 3.45E-05 | 5.16E-03  |

**Table S2: Statistical Analyses for Supplementary Figures**

**Figure S1B**

| SA-β-galactosidase |                  |              | p-values |
|--------------------|------------------|--------------|----------|
| Sample             | SA-βgal positive | Standard Dev | PRE      |
| PRE                | 15.8%            | 4.9%         |          |
| SEN(XRA)           | 84.7%            | 7.8%         | 1.12E-03 |

**Figure S1D**

| IL-6     |    |         |              | p-values |          |          |
|----------|----|---------|--------------|----------|----------|----------|
| Sample   |    | Average | Standard Dev | PRE      | PRE+SB   | SEN(XRA) |
| PRE      | -  | 1.00    | 0.10         |          |          |          |
|          | SB | 0.66    | 0.07         | 5.44E-02 |          |          |
|          | -  | 60.39   | 1.09         | 1.70E-04 | 1.67E-04 |          |
| SEN(XRA) | SB | 19.39   | 3.69         | 1.95E-02 | 1.88E-02 | 4.37E-03 |

**Figure S1E**

| IL-6          |    |         |              | p-values |          |          |
|---------------|----|---------|--------------|----------|----------|----------|
| Sample - HCA2 |    | Average | Standard Dev | PRE      | PRE+SB   | SEN(REP) |
| PRE           | -  | 1.00    | 0.50         |          |          |          |
|               | SB | 0.45    | 0.10         | 7.32E-02 |          |          |
|               | -  | 21.39   | 4.53         | 5.19E-04 | 4.38E-04 |          |
| SEN(REP)      | SB | 6.08    | 0.30         | 2.12E-05 | 1.34E-06 | 7.79E-03 |

| IL-6           |    |         |              | p-values |          |          |
|----------------|----|---------|--------------|----------|----------|----------|
| Sample - WI-38 |    | Average | Standard Dev | PRE      | PRE+SB   | SEN(REP) |
| PRE            | -  | 1.00    | 0.42         |          |          |          |
|                | SB | 0.67    | 0.13         | 1.85E-01 |          |          |
|                | -  | 298.94  | 60.80        | 6.50E-05 | 6.46E-05 |          |
| SEN(REP)       | SB | 136.33  | 47.51        | 1.26E-03 | 1.25E-03 | 5.59E-03 |

**Figure S1I**

| MMP-1    |         |         |              | p-values |          |
|----------|---------|---------|--------------|----------|----------|
| Sample   |         | Average | Standard Dev | -        | SB 2d    |
| SEN(XRA) | -       | 1.00    | 0.30         |          |          |
|          | SB 2d   | 1.23    | 0.10         | 2.66E-01 |          |
|          | SB cont | 1.07    | 0.04         | 7.24E-01 | 5.67E-02 |

| MMP-3    |         |         |              | p-values |          |
|----------|---------|---------|--------------|----------|----------|
| Sample   |         | Average | Standard Dev | -        | SB 2d    |
| SEN(XRA) | -       | 1.00    | 0.28         |          |          |
|          | SB 2d   | 1.06    | 0.08         | 7.44E-01 |          |
|          | SB cont | 0.39    | 0.04         | 2.02E-02 | 2.18E-04 |

**Figure S2B**

| MMP-1    |         |         |              | p-values |          |
|----------|---------|---------|--------------|----------|----------|
| Sample   |         | Average | Standard Dev | -        | SB 2d    |
| SEN(RAS) | -       | 1.00    | 0.00         |          |          |
|          | SB 2d   | 0.70    | 0.02         | 2.42E-03 |          |
|          | SB cont | 0.47    | 0.01         | 3.11E-04 | 5.30E-03 |

| MMP-3    |         |         |              | p-values |          |
|----------|---------|---------|--------------|----------|----------|
| Sample   |         | Average | Standard Dev | -        | SB 2d    |
| SEN(RAS) | -       | 1.00    | 0.24         |          |          |
|          | SB 2d   | 0.62    | 0.10         | 8.10E-02 |          |
|          | SB cont | 0.15    | 0.03         | 7.28E-03 | 1.40E-03 |

**Figure S2E**

| IL-6   |    |         |              | p-values |          |          |
|--------|----|---------|--------------|----------|----------|----------|
| Sample |    | Average | Standard Dev | shGFP    | shGFP+SB | shp53    |
| shGFP  | -  | 2.31    | 0.16         |          |          |          |
|        | SB | 0.39    | 0.13         | 8.45E-05 |          |          |
| shp53  | -  | 100.00  | 4.63         | 3.35E-06 | 3.09E-06 |          |
|        | SB | 9.31    | 2.63         | 1.52E-02 | 7.70E-03 | 1.51E-04 |

| IL-8   |    |         |              | p-values |          |          |
|--------|----|---------|--------------|----------|----------|----------|
| Sample |    | Average | Standard Dev | shGFP    | shGFP+SB | shp53    |
| shGFP  | -  | 0.46    | 0.10         |          |          |          |
|        | SB | 0.44    | 0.00         | 8.16E-01 |          |          |
| shp53  | -  | 100.00  | 9.76         | 6.04E-05 | 6.04E-05 |          |
|        | SB | 12.16   | 1.58         | 2.15E-04 | 2.13E-04 | 1.04E-04 |

| GM-CSF |    |         |              | p-values |          |          |
|--------|----|---------|--------------|----------|----------|----------|
| Sample |    | Average | Standard Dev | shGFP    | shGFP+SB | shp53    |
| shGFP  | -  | 0.55    | 0.27         |          |          |          |
|        | SB | 0.63    | 0.05         | 6.50E-01 |          |          |
| shp53  | -  | 100.00  | 5.09         | 4.56E-06 | 4.55E-06 |          |
|        | SB | 11.99   | 0.91         | 3.16E-05 | 2.77E-05 | 7.87E-06 |

**Figure S3A**

| SA-β-galactosidase |              | p-values         |              |              |
|--------------------|--------------|------------------|--------------|--------------|
| Cell Type          | Sample       | SA-βgal positive | Standard Dev | PRE (Vector) |
| HCA2               | PRE (Vector) | 3.2%             | 6.3%         | 5.76E-68     |
|                    | MKK6EE       | 80.0%            | 6.3%         |              |
| WI-38              | PRE (Vector) | 1.5%             | 7.1%         | 2.65E-74     |
|                    | MKK6EE       | 88.0%            | 6.3%         |              |

**Figure S3B**

| BrdU Quantification |                 |                | p-values     |          |
|---------------------|-----------------|----------------|--------------|----------|
| Sample              | % BrdU positive | Standard Error | PRE (Vector) | MKK6EE   |
| PRE                 | 69.9%           | 3.4%           | 3.02E-129    | 3.15E-67 |
| MKK6EE              | 4.8%            | 4.2%           |              |          |
| MKK6EE + SB         | 47.4%           | 3.2%           | 2.44E-22     |          |

**Figure S3D**

| IL-6        |         |              | p-values     |          |
|-------------|---------|--------------|--------------|----------|
| Sample      | Average | Standard Dev | PRE (Vector) | MKK6EE   |
| PRE         | 1.00    | 0.13         | 2.20E-06     | 2.40E-06 |
| MKK6EE      | 547.22  | 23.32        |              |          |
| MKK6EE + SB | 6.23    | 3.57         | 6.45E-02     |          |

**Figure S3E**

| MMP-1    |         |              | p-values |  |
|----------|---------|--------------|----------|--|
| Sample   | Average | Standard Dev | PRE      |  |
| SEN(RAS) | -       | 1.00         | 0.13     |  |
| SB 2d    | 7.55    | 1.87         | 3.79E-03 |  |

| MMP-3    |         |              | p-values |  |
|----------|---------|--------------|----------|--|
| Sample   | Average | Standard Dev | PRE      |  |
| SEN(RAS) | -       | 1.00         | 0.01     |  |
| SB 2d    | 22.02   | 2.63         | 1.57E-04 |  |

**Figure S4A**

| 53BP1 foci |    |                 |                | p-values |  |
|------------|----|-----------------|----------------|----------|--|
| 1 hour     |    | % ≥3 53BP1 foci | Standard Error | XRA      |  |
| XRA        | -  | 96.5%           | 4.4%           | 6.02E-01 |  |
|            | SB | 97.0%           | 3.8%           |          |  |

| 53BP1 foci |    |                 |                | p-values |  |
|------------|----|-----------------|----------------|----------|--|
| 1 day      |    | % ≥3 53BP1 foci | Standard Error | XRA      |  |
| XRA        | -  | 99.6%           | 3.9%           | 1.30E-01 |  |
|            | SB | 98.8%           | 3.9%           |          |  |

| 53BP1 foci |    |                 |                | p-values |  |
|------------|----|-----------------|----------------|----------|--|
| 2 days     |    | % ≥3 53BP1 foci | Standard Error | XRA      |  |
| XRA        | -  | 94.8%           | 4.0%           | 9.14E-01 |  |
|            | SB | 94.6%           | 4.0%           |          |  |

| 53BP1 foci |    |                 |                | p-values |  |
|------------|----|-----------------|----------------|----------|--|
| 4 days     |    | % ≥3 53BP1 foci | Standard Error | XRA      |  |
| XRA        | -  | 96.9%           | 8.8%           | 1.35E-01 |  |
|            | SB | 99.3%           | 8.3%           |          |  |

| 53BP1 foci |    |                 |                | p-values |  |
|------------|----|-----------------|----------------|----------|--|
| 6 days     |    | % ≥3 53BP1 foci | Standard Error | XRA      |  |
| XRA        | -  | 77.4%           | 6.0%           | 1.15E-04 |  |
|            | SB | 62.3%           | 6.1%           |          |  |

| 53BP1 foci |    |                 |                | p-values |  |
|------------|----|-----------------|----------------|----------|--|
| 8 days     |    | % ≥3 53BP1 foci | Standard Error | XRA      |  |
| XRA        | -  | 60.5%           | 7.5%           | 3.75E-03 |  |
|            | SB | 44.6%           | 8.0%           |          |  |

**Figure S4G**

| IL-6     |       |         |              | p-values |          |          |          |          |          |          |
|----------|-------|---------|--------------|----------|----------|----------|----------|----------|----------|----------|
| Sample   | uM SB | Average | Standard Dev | PRE      | SEN(XRA) | -        | 10       | 5        | 1        | 0.2      |
| PRE      | -     | 1.00    | 0.28         | -        | -        | -        | 10       | 5        | 1        | 0.2      |
| SEN(XRA) | -     | 30.28   | 5.85         | 9.78E-04 | -        | -        | -        | -        | -        | -        |
| MKK6EE   | -     | 104.46  | 6.12         | 8.15E-06 | 1.10E-04 | -        | -        | -        | -        | -        |
|          | 10    | 1.51    | 0.53         | 2.16E-01 | 1.06E-03 | 8.40E-06 | -        | -        | -        | -        |
|          | 5     | 1.77    | 0.30         | 3.04E-02 | 1.08E-03 | 8.40E-06 | 4.98E-01 | -        | -        | -        |
|          | 1     | 5.98    | 1.28         | 2.76E-03 | 2.16E-03 | 1.08E-05 | 5.07E-03 | 5.20E-03 | -        | -        |
|          | 0.2   | 77.26   | 13.40        | 5.94E-04 | 5.10E-03 | 3.30E-02 | 6.11E-04 | 6.18E-04 | 7.84E-04 | -        |
|          | 0.04  | 101.20  | 5.10         | 4.48E-06 | 9.32E-05 | 5.17E-01 | 4.65E-06 | 4.63E-06 | 6.17E-06 | 4.45E-02 |

**Figure S5A**

| GM-CSF        |         |              | p-values |          |          |
|---------------|---------|--------------|----------|----------|----------|
| Sample        | Average | Standard Dev | PRE      | PRE + SB | SEN(XRA) |
| PRE           | 1.00    | 0.62         |          |          |          |
| PRE + SB      | 3.21    | 0.17         | 9.21E-03 |          |          |
| SEN(XRA)      | 5.31    | 1.92         | 5.24E-03 | 2.19E-01 |          |
| SEN(XRA) + SB | 5.37    | 0.96         | 2.14E-03 | 8.78E-02 | 9.69E-01 |

| IL-6          |         |              | p-values |          |          |
|---------------|---------|--------------|----------|----------|----------|
| Sample        | Average | Standard Dev | PRE      | PRE + SB | SEN(XRA) |
| PRE           | 1.00    | 0.09         |          |          |          |
| PRE + SB      | 1.21    | 0.01         | 4.13E-02 |          |          |
| SEN(XRA)      | 27.48   | 2.44         | 6.24E-07 | 1.36E-04 |          |
| SEN(XRA) + SB | 11.70   | 0.56         | 1.90E-06 | 1.44E-03 | 1.02E-03 |

| IL-8          |         |              | p-values |          |          |
|---------------|---------|--------------|----------|----------|----------|
| Sample        | Average | Standard Dev | PRE      | PRE + SB | SEN(XRA) |
| PRE           | 1.00    | 0.08         |          |          |          |
| PRE + SB      | 1.41    | 0.02         | 2.60E-03 |          |          |
| SEN(XRA)      | 15.11   | 1.52         | 1.60E-06 | 2.76E-04 |          |
| SEN(XRA) + SB | 7.04    | 0.33         | 2.72E-06 | 1.76E-03 | 2.18E-03 |

| GROα          |         |              | p-values |          |          |
|---------------|---------|--------------|----------|----------|----------|
| Sample        | Average | Standard Dev | PRE      | PRE + SB | SEN(XRA) |
| PRE           | 1.00    | 0.09         |          |          |          |
| PRE + SB      | 1.20    | 0.03         | 3.87E-02 |          |          |
| SEN(XRA)      | 23.99   | 1.55         | 9.86E-08 | 4.01E-05 |          |
| SEN(XRA) + SB | 12.18   | 0.63         | 2.35E-06 | 1.64E-03 | 5.88E-04 |

| MCP-2         |         |              | p-values |          |          |
|---------------|---------|--------------|----------|----------|----------|
| Sample        | Average | Standard Dev | PRE      | PRE + SB | SEN(XRA) |
| PRE           | 1.00    | 0.14         |          |          |          |
| PRE + SB      | 0.90    | 0.02         | 4.28E-01 |          |          |
| SEN(XRA)      | 145.65  | 29.92        | 4.46E-04 | 2.97E-03 |          |
| SEN(XRA) + SB | 53.45   | 5.62         | 3.94E-04 | 5.68E-03 | 1.50E-02 |

**Figure S5B**

| Factor | Sample      | mRNA level | Protein level | mRNA StDev | Protein StDev | p-value mRNA vs Protein |
|--------|-------------|------------|---------------|------------|---------------|-------------------------|
| GM-CSF | SEN(XRA)    | 1.00       | 1.00          | 0.07       | 0.07          | -                       |
|        | SEN(XRA)+SB | 0.43       | 0.26          | 0.09       | 0.04          | 0.19                    |
| IL-6   | SEN(XRA)    | 1.00       | 1.00          | 0.17       | 0.11          | -                       |
|        | SEN(XRA)+SB | 0.27       | 0.29          | 0.04       | 0.02          | 0.05                    |
| IL-8   | SEN(XRA)    | 1.00       | 1.00          | 0.06       | 0.07          | -                       |
|        | SEN(XRA)+SB | 0.40       | 0.34          | 0.06       | 0.04          | 0.72                    |

**Figure S5C**

| IL-6   |         |              | p-values |
|--------|---------|--------------|----------|
| Sample | Average | Standard Dev | PRE      |
| PRE    | 1.00    | 0.06         |          |
| MKK6EE | 47.50   | 9.14         | 1.88E-02 |

| IL-8   |         |              | p-values |
|--------|---------|--------------|----------|
| Sample | Average | Standard Dev | PRE      |
| PRE    | 1.00    | 0.00         |          |
| MKK6EE | 71.51   | 1.05         | 1.11E-04 |

**Figure S5D**

| NF-κB DNA Binding |       |       |                |
|-------------------|-------|-------|----------------|
| Sample            | Value | StDev | p-value vs PRE |
| PRE               | 1.00  | 0.075 | -              |
| SEN(MKK6)         | 4.12  | 0.099 | 5.28E-04       |
| SEN(REP)          | 3.53  | 0.628 | 2.95E-02       |
| SEN(RAS)          | 5.53  | 0.052 | 2.01E-04       |
| SEN(XRA)          | 4.26  | 0.128 | 1.66E-06       |

**Figure S5E**

| NF-κB DNA Binding |         |              | p-values |
|-------------------|---------|--------------|----------|
| Sample - WI-38    | Average | Standard Dev | PRE      |
| PRE               | 1.00    | 0.02         | -        |
| SEN(XRA)          | 3.78    | 0.03         | 8.46E-05 |

**Figure S5F**

| NF-κB DNA Binding |       |       |                |
|-------------------|-------|-------|----------------|
| Time after XRA    | Value | StDev | p-value vs PRE |
| PRE               | 1.00  | 0.06  | -              |
| 2 hr              | 1.64  | 0.18  | 4.13E-02       |
| 4 hr              | 1.77  | 0.06  | 6.66E-03       |
| 8 hr              | 1.40  | 0.01  | 1.27E-02       |
| 24 hr             | 2.25  | 0.03  | 1.60E-03       |



|        |      |      |          |
|--------|------|------|----------|
| 48 hr  | 2.31 | 0.15 | 7.35E-03 |
| 6 day  | 3.44 | 0.27 | 6.46E-03 |
| 8 day  | 4.39 | 0.04 | 2.58E-04 |
| 10 day | 4.73 | 0.48 | 8.28E-03 |

### Figure S5H

| MMP-1    |           | Average | Standard Dev | p-values |           |
|----------|-----------|---------|--------------|----------|-----------|
| Sample   |           |         |              | shGFP    | shRelA #1 |
| SEN(XRA) | shGFP     | 1.00    | 0.23         |          |           |
|          | shRelA #1 | 0.13    | 0.05         | 6.58E-03 |           |
|          | shRelA #2 | 0.13    | 0.03         | 6.07E-03 | 9.75E-01  |

| MMP-3    |           | Average | Standard Dev | p-values |           |
|----------|-----------|---------|--------------|----------|-----------|
| Sample   |           |         |              | shGFP    | shRelA #1 |
| SEN(XRA) | shGFP     | 1.00    | 0.14         |          |           |
|          | shRelA #1 | 0.23    | 0.05         | 8.02E-04 |           |
|          | shRelA #2 | 0.15    | 0.03         | 4.68E-04 | 5.60E-02  |

### Figure S5I

| IL-6          |           | Average | Standard Dev | p-values |               |           |          |           |
|---------------|-----------|---------|--------------|----------|---------------|-----------|----------|-----------|
| Sample - HCA2 |           |         |              | shGFP    | PRE shRelA #1 | shRelA #2 | SEN(XRA) |           |
|               |           |         |              | shGFP    | shRelA #1     | shRelA #2 | shGFP    | shRelA #1 |
| PRE           | shGFP     | 1.00    | 0.09         |          |               |           |          |           |
|               | shRelA #1 | 0.38    | 0.05         | 4.89E-04 |               |           |          |           |
|               | shRelA #2 | 0.25    | 0.01         | 1.34E-04 | 1.33E-02      |           |          |           |
| SEN(XRA)      | shGFP     | 13.61   | 1.49         | 1.25E-04 | 1.03E-04      | 9.92E-05  |          |           |
|               | shRelA #1 | 1.79    | 0.28         | 9.16E-03 | 9.80E-04      | 6.53E-04  | 1.72E-04 |           |
|               | shRelA #2 | 1.69    | 0.09         | 7.07E-04 | 2.70E-05      | 1.09E-05  | 1.57E-04 | 5.73E-01  |

| IL-6           |           | Average | Standard Dev | p-values |               |           |          |           |
|----------------|-----------|---------|--------------|----------|---------------|-----------|----------|-----------|
| Sample - WI-38 |           |         |              | shGFP    | PRE shRelA #1 | shRelA #2 | SEN(XRA) |           |
|                |           |         |              | shGFP    | shRelA #1     | shRelA #2 | shGFP    | shRelA #1 |
| PRE            | shGFP     | 1.00    | 0.16         |          |               |           |          |           |
|                | shRelA #1 | 3.91    | 0.22         | 4.09E-04 |               |           |          |           |
|                | shRelA #2 | 1.75    | 0.41         | 5.40E-02 | 2.23E-02      |           |          |           |
| SEN(XRA)       | shGFP     | 28.04   | 1.22         | 2.83E-06 | 1.20E-04      | 9.83E-05  |          |           |
|                | shRelA #1 | 8.89    | 1.41         | 6.49E-04 | 1.81E-02      | 6.92E-03  | 5.85E-05 |           |
|                | shRelA #2 | 3.04    | 0.32         | 5.93E-04 | 4.62E-02      | 2.80E-02  | 4.28E-06 | 2.18E-03  |

### Figure S5J

| IL-6         |           | Average | Standard Dev | p-values           |           |          |
|--------------|-----------|---------|--------------|--------------------|-----------|----------|
| Sample       |           |         |              | PRE (Vector) shGFP | MKK6EE    |          |
|              |           |         | shGFP        | shGFP              | shRelA #1 |          |
| PRE (Vector) | shGFP     | 0.58    | 0.08         |                    |           |          |
| MKK6EE       | shGFP     | 100.00  | 9.30         | 2.62E-04           |           |          |
|              | shRelA #1 | 36.68   | 3.11         | 3.61E-05           | 1.35E-03  |          |
|              | shRelA #2 | 24.34   | 3.26         | 2.26E-04           | 8.19E-04  | 8.98E-03 |

| IL-8         |           | Average | Standard Dev | p-values           |           |          |
|--------------|-----------|---------|--------------|--------------------|-----------|----------|
| Sample       |           |         |              | PRE (Vector) shGFP | MKK6EE    |          |
|              |           |         | shGFP        | shGFP              | shRelA #1 |          |
| PRE (Vector) | shGFP     | 0.40    | 0.04         |                    |           |          |
| MKK6EE       | shGFP     | 100.00  | 16.67        | 4.06E-03           |           |          |
|              | shRelA #1 | 32.65   | 3.07         | 7.76E-04           | 2.34E-03  |          |
|              | shRelA #2 | 16.15   | 2.89         | 5.27E-03           | 1.01E-03  | 2.48E-03 |

| GM-CSF       |           | Average | Standard Dev | p-values           |           |          |
|--------------|-----------|---------|--------------|--------------------|-----------|----------|
| Sample       |           |         |              | PRE (Vector) shGFP | MKK6EE    |          |
|              |           |         | shGFP        | shGFP              | shRelA #1 |          |
| PRE (Vector) | shGFP     | 0.00    | 0.00         |                    |           |          |
| MKK6EE       | shGFP     | 100.00  | 11.88        | 1.49E-03           |           |          |
|              | shRelA #1 | 30.83   | 6.98         | 9.59E-03           | 9.64E-04  |          |
|              | shRelA #2 | 11.36   | 0.90         | 4.54E-04           | 2.09E-04  | 8.69E-03 |
